# Supplementary material
Source: PubMed Central journal article supplement (PMC3148697)

**Supplemental Table 1.**

Demographics and clinical characteristics of the chronic kidney disease (CKD) patients subjected to kidney biopsies and  $^{99m}\text{Tc}$ -MAG3 scintigraphy. eGFR, estimated glomerular filtration rate; and Hb, hemoglobin.

**Supplemental Figure 1. Relationship among ADC values, T2\* values, residual kidney function, and kidney size**

Decreased kidney size is accompanied by reduced eGFR, and ADC and T2\* values in CKD patients without diabetes (A, B, and C). In diabetic nephropathy patients, ADC values and kidney size showed a significant positive correlation (E), but no correlation was detected between T2\* values and kidney size (F). The red-colored data indicates statistical significance of correlation. CKD, chronic kidney disease; eGFR, estimated glomerular filtration rate.

|                                    | CKD w/o diabetes,<br>with biopsy | Renal arterial stenosis<br>(with <sup>99m</sup> Tc-MAG3) |
|------------------------------------|----------------------------------|----------------------------------------------------------|
| <b>Number of cases</b>             | 37                               | 13                                                       |
| Male                               | 20                               | 7                                                        |
| Female                             | 17                               | 6                                                        |
| <b>Age (years)</b>                 | 48.9 ± 17.8                      | 51.2 ± 18.2                                              |
| <b>Laboratory findings</b>         |                                  |                                                          |
| eGFR (mL/min/1.73 m <sup>2</sup> ) | 56.2 ± 30.2                      | 46.0 ± 26.6                                              |
| Serum albumin (mg/dL)              | 3.2 ± 1.0                        | 3.88 ± 0.73                                              |
| Hb (g/dL)                          | 12.3 ± 2.3                       | 13.0 ± 1.85                                              |
| Urinary protein (mg/g · uCr)       | 2508.4 ± 2733.6                  | 555.2 ± 1026.4                                           |
| <b>Primary disease</b>             |                                  |                                                          |
|                                    | Hypertensive nephrosclerosis 4   |                                                          |
|                                    | Vasculitic syndrome 3            |                                                          |
|                                    | Chronic glomerulonephritis 20    |                                                          |
|                                    | Chronic interstitial nephritis 8 |                                                          |
|                                    | Asymptomatic hematuria 2         |                                                          |

**CKD**  
**w/o diabetes**

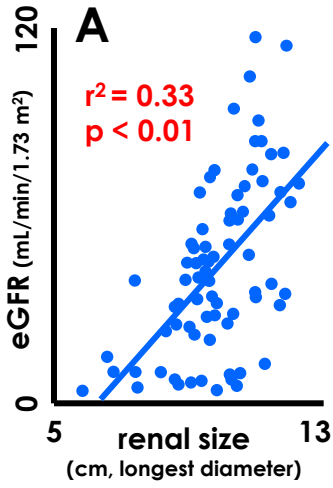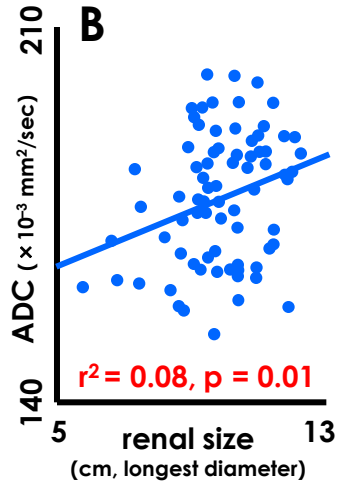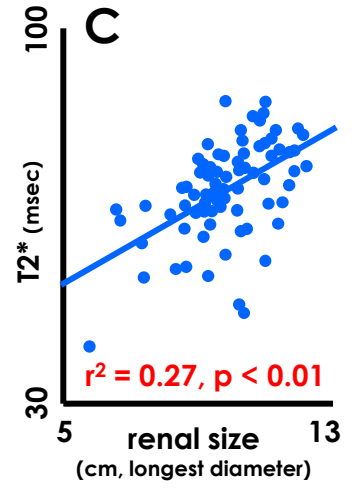

**Diabetic**  
**nephropathy**

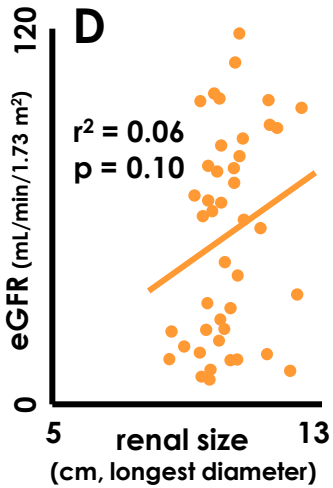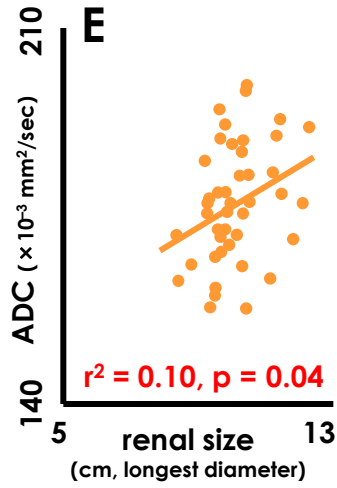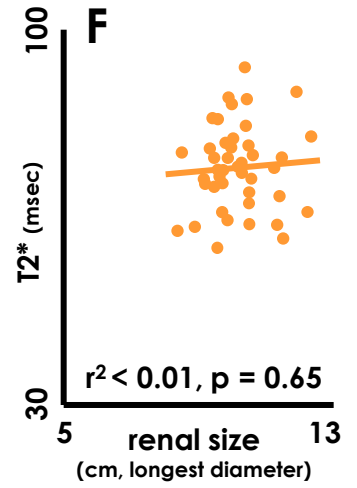

Supplement: supp_ASN.2010111143_supplemental_info.pdf [file supp_ASN.2010111143_supplemental_info.pdf]
